# Supplementary material
Source: publisher figshare collection journal article supplement (https://f1000.figshare.com/ndownloader/files/100698)
Supplement: Supplementary file 1 [file 100698]

time (mins)	Chemiluminescence (mV)
10	17.50641
10.00417	17.50231
10.00833	17.46527
10.0125	17.40561
10.01667	17.33269
10.02083	17.25411
10.025	17.17681
10.02917	17.10139
10.03333	17.0232
10.0375	16.93532
10.04167	16.83385
10.04583	16.72344
10.05	16.62292
10.05417	16.55639
10.05833	16.54388
10.0625	16.59655
10.06667	16.71657
10.07083	16.8913
10.075	17.10084
10.07917	17.31679
10.08333	17.50934
10.0875	17.65485
10.09167	17.74559
10.09583	17.78328
10.1	17.7755
10.10417	17.73325
10.10833	17.66893
10.1125	17.59172
10.11667	17.51077
10.12083	17.4247
10.125	17.3266
10.12917	17.21109
10.13333	17.08412
10.1375	16.95828
10.14167	16.85091
10.14583	16.78145
10.15	16.76585
10.15417	16.81324
10.15833	16.92512
10.1625	17.08413
10.16667	17.26587
10.17083	17.44823
10.175	17.61636
10.17917	17.76017
10.18333	17.87148
10.1875	17.9427
10.19167	17.96632
10.19583	17.93744
10.2	17.8544
10.20417	17.71699
10.20833	17.54182
10.2125	17.36199
10.21667	17.21679
10.22083	17.14238
10.225	17.15903
10.22917	17.26508
10.23333	17.4374
10.2375	17.63554
10.24167	17.80988
10.24583	17.91695
10.25	17.94033
10.25417	17.89391
10.25833	17.81297
10.2625	17.74566
10.26667	17.73569
10.27083	17.81001
10.275	17.96891
10.27917	18.18222
10.28333	18.39831
10.2875	18.56113
10.29167	18.63264
10.29583	18.60146
10.3	18.47949
10.30417	18.30168
10.30833	18.11256
10.3125	17.95301
10.31667	17.84533
10.32083	17.78923
10.325	17.76882
10.32917	17.75857
10.33333	17.73929
10.3375	17.69994
10.34167	17.63822
10.34583	17.56733
10.35	17.50363
10.35417	17.45983
10.35833	17.44252
10.3625	17.45521
10.36667	17.50014
10.37083	17.57164
10.375	17.66497
10.37917	17.77097
10.38333	17.88065
10.3875	17.98768
10.39167	18.07756
10.39583	18.13549
10.4	18.15553
10.40417	18.13986
10.40833	18.09634
10.4125	18.02784
10.41667	17.93807
10.42083	17.8268
10.425	17.69767
10.42917	17.55503
10.43333	17.40154
10.4375	17.25036
10.44167	17.12555
10.44583	17.05232
10.45	17.05178
10.45417	17.12817
10.45833	17.27288
10.4625	17.46749
10.46667	17.69178
10.47083	17.92035
10.475	18.12593
10.47917	18.28902
10.48333	18.39716
10.4875	18.443
10.49167	18.42412
10.49583	18.34249
10.5	18.21082
10.50417	18.05615
10.50833	17.91283
10.5125	17.81116
10.51667	17.76694
10.52083	17.78174
10.525	17.84153
10.52917	17.91825
10.53333	17.97833
10.5375	17.99603
10.54167	17.96134
10.54583	17.88406
10.55	17.78603
10.55417	17.69527
10.55833	17.62962
10.5625	17.59655
10.56667	17.59233
10.57083	17.60082
10.575	17.60317
10.57917	17.58752
10.58333	17.55283
10.5875	17.50972
10.59167	17.47398
10.59583	17.4623
10.6	17.47682
10.60417	17.51096
10.60833	17.55294
10.6125	17.58353
10.61667	17.59091
10.62083	17.57948
10.625	17.56819
10.62917	17.58045
10.63333	17.63048
10.6375	17.71767
10.64167	17.82037
10.64583	17.90773
10.65	17.94863
10.65417	17.91574
10.65833	17.81043
10.6625	17.66621
10.66667	17.53298
10.67083	17.45412
10.675	17.4501
10.67917	17.51717
10.68333	17.62819
10.6875	17.74243
10.69167	17.81685
10.69583	17.8156
10.7	17.73283
10.70417	17.5876
10.70833	17.41007
10.7125	17.22553
10.71667	17.05309
10.72083	16.91228
10.725	16.8215
10.72917	16.79359
10.73333	16.83468
10.7375	16.93998
10.74167	17.09769
10.74583	17.2843
10.75	17.46555
10.75417	17.59872
10.75833	17.654
10.7625	17.63178
10.76667	17.56007
10.77083	17.48043
10.775	17.43678
10.77917	17.46013
10.78333	17.5598
10.7875	17.7225
10.79167	17.9127
10.79583	18.08169
10.8	18.19255
10.80417	18.23546
10.80833	18.22096
10.8125	18.16875
10.81667	18.10132
10.82083	18.03458
10.825	17.97343
10.82917	17.91449
10.83333	17.84318
10.8375	17.74333
10.84167	17.61245
10.84583	17.46769
10.85	17.33591
10.85417	17.24701
10.85833	17.22716
10.8625	17.28903
10.86667	17.43027
10.87083	17.63056
10.875	17.85213
10.87917	18.05017
10.88333	18.18855
10.8875	18.24935
10.89167	18.23305
10.89583	18.15769
10.9	18.05159
10.90417	17.94361
10.90833	17.86137
10.9125	17.81605
10.91667	17.80594
10.92083	17.81944
10.925	17.84455
10.92917	17.87345
10.93333	17.90347
10.9375	17.93429
10.94167	17.96498
10.94583	17.99227
10.95	18.01208
10.95417	18.01022
10.95833	17.97814
10.9625	17.91367
10.96667	17.82332
10.97083	17.72306
10.975	17.63382
10.97917	17.57349
10.98333	17.55296
10.9875	17.57311
10.99167	17.62448
10.99583	17.68894
11	17.75598
11.00417	17.81946
11.00833	17.87554
11.0125	17.92482
11.01667	17.9691
11.02083	18.00716
11.025	18.03362
11.02917	18.03996
11.03333	18.02112
11.0375	17.98098
11.04167	17.93694
11.04583	17.90972
11.05	17.91368
11.05417	17.95443
11.05833	18.02892
11.0625	18.12179
11.06667	18.20856
11.07083	18.26375
11.075	18.27173
11.07917	18.22846
11.08333	18.14134
11.0875	18.02441
11.09167	17.89146
11.09583	17.75633
11.1	17.6345
11.10417	17.53824
11.10833	17.47809
11.1125	17.45945
11.11667	17.48198
11.12083	17.53508
11.125	17.59801
11.12917	17.64538
11.13333	17.65337
11.1375	17.6073
11.14167	17.51012
11.14583	17.38524
11.15	17.27173
11.15417	17.2075
11.15833	17.22202
11.1625	17.32544
11.16667	17.50264
11.17083	17.71756
11.175	17.92453
11.17917	18.07648
11.18333	18.14209
11.1875	18.11561
11.19167	18.0151
11.19583	17.87422
11.2	17.73687
11.20417	17.64288
11.20833	17.61767
11.2125	17.6671
11.21667	17.77829
11.22083	17.9205
11.225	18.05775
11.22917	18.15871
11.23333	18.20334
11.2375	18.18681
11.24167	18.11763
11.24583	18.01513
11.25	17.90471
11.25417	17.80784
11.25833	17.73542
11.2625	17.68756
11.26667	17.65504
11.27083	17.62568
11.275	17.58963
11.27917	17.54215
11.28333	17.48481
11.2875	17.43019
11.29167	17.39475
11.29583	17.38746
11.3	17.40888
11.30417	17.45403
11.30833	17.50994
11.3125	17.56363
11.31667	17.60695
11.32083	17.63676
11.325	17.65601
11.32917	17.67359
11.33333	17.69349
11.3375	17.70977
11.34167	17.7149
11.34583	17.70182
11.35	17.66794
11.35417	17.62205
11.35833	17.58488
11.3625	17.57735
11.36667	17.61453
11.37083	17.69837
11.375	17.80989
11.37917	17.91456
11.38333	17.97543
11.3875	17.96281
11.39167	17.86947
11.39583	17.71322
11.4	17.53451
11.40417	17.37727
11.40833	17.28141
11.4125	17.2692
11.41667	17.3374
11.42083	17.462
11.425	17.60483
11.42917	17.72701
11.43333	17.80086
11.4375	17.81226
11.44167	17.76386
11.44583	17.66613
11.45	17.53934
11.45417	17.40377
11.45833	17.27462
11.4625	17.16289
11.46667	17.07289
11.47083	17.01
11.475	16.97741
11.47917	16.97807
11.48333	17.01411
11.4875	17.08482
11.49167	17.19152
11.49583	17.33196
11.5	17.497
11.50417	17.67106
11.50833	17.83295
11.5125	17.96317
11.51667	18.03921
11.52083	18.04717
11.525	17.98085
11.52917	17.84774
11.53333	17.67171
11.5375	17.48629
11.54167	17.32512
11.54583	17.21529
11.55	17.17192
11.55417	17.1955
11.55833	17.2679
11.5625	17.36513
11.56667	17.4569
11.57083	17.52216
11.575	17.55429
11.57917	17.561
11.58333	17.55932
11.5875	17.57037
11.59167	17.6108
11.59583	17.68967
11.6	17.80287
11.60417	17.93511
11.60833	18.06015
11.6125	18.15643
11.61667	18.20977
11.62083	18.21712
11.625	18.18741
11.62917	18.13874
11.63333	18.09129
11.6375	18.06429
11.64167	18.06378
11.64583	18.07884
11.65	18.08691
11.65417	18.06575
11.65833	17.99846
11.6625	17.8824
11.66667	17.73208
11.67083	17.57643
11.675	17.45018
11.67917	17.38391
11.68333	17.38916
11.6875	17.45478
11.69167	17.55459
11.69583	17.65842
11.7	17.74363
11.70417	17.80212
11.70833	17.8391
11.7125	17.87126
11.71667	17.91667
11.72083	17.98564
11.725	18.07232
11.72917	18.15486
11.73333	18.2066
11.7375	18.21032
11.74167	18.16849
11.74583	18.09821
11.75	18.02606
11.75417	17.9818
11.75833	17.98483
11.7625	18.03744
11.76667	18.1211
11.77083	18.20002
11.775	18.23614
11.77917	18.20556
11.78333	18.10619
11.7875	17.9525
11.79167	17.77388
11.79583	17.60427
11.8	17.47293
11.80417	17.39802
11.80833	17.38174
11.8125	17.41017
11.81667	17.46128
11.82083	17.5147
11.825	17.55629
11.82917	17.5771
11.83333	17.57284
11.8375	17.54182
11.84167	17.48932
11.84583	17.42524
11.85	17.3626
11.85417	17.31375
11.85833	17.28962
11.8625	17.30043
11.86667	17.35235
11.87083	17.44465
11.875	17.56489
11.87917	17.69531
11.88333	17.82175
11.8875	17.93664
11.89167	18.03823
11.89583	18.12386
11.9	18.19106
11.90417	18.23766
11.90833	18.26065
11.9125	18.26074
11.91667	18.23562
11.92083	18.18738
11.925	18.12696
11.92917	18.07147
11.93333	18.03086
11.9375	18.00018
11.94167	17.96708
11.94583	17.91439
11.95	17.82763
11.95417	17.70671
11.95833	17.55713
11.9625	17.3963
11.96667	17.2505
11.97083	17.14545
11.975	17.09136
11.97917	17.0846
11.98333	17.11773
11.9875	17.17954
11.99167	17.26125
11.99583	17.36286
12	17.48261
12.00417	17.62155
12.00833	17.77714
12.0125	17.94067
12.01667	18.0946
12.02083	18.22443
12.025	18.324
12.02917	18.39136
12.03333	18.42778
12.0375	18.43819
12.04167	18.42566
12.04583	18.39235
12.05	18.33632
12.05417	18.25374
12.05833	18.14242
12.0625	18.01071
12.06667	17.87292
12.07083	17.74341
12.075	17.63202
12.07917	17.5456
12.08333	17.48963
12.0875	17.46554
12.09167	17.47222
12.09583	17.50588
12.1	17.56456
12.10417	17.64801
12.10833	17.7507
12.1125	17.85954
12.11667	17.95509
12.12083	18.02043
12.125	18.04602
12.12917	18.02902
12.13333	17.97754
12.1375	17.90961
12.14167	17.85413
12.14583	17.83763
12.15	17.87403
12.15417	17.96129
12.15833	18.08382
12.1625	18.21877
12.16667	18.33663
12.17083	18.40991
12.175	18.42175
12.17917	18.37369
12.18333	18.28476
12.1875	18.1758
12.19167	18.06575
12.19583	17.97134
12.2	17.90246
12.20417	17.85868
12.20833	17.82677
12.2125	17.79314
12.21667	17.74867
12.22083	17.69675
12.225	17.64857
12.22917	17.61438
12.23333	17.6067
12.2375	17.63892
12.24167	17.71158
12.24583	17.81046
12.25	17.91152
12.25417	17.99155
12.25833	18.03231
12.2625	18.02916
12.26667	17.98968
12.27083	17.92962
12.275	17.87142
12.27917	17.83623
12.28333	17.82771
12.2875	17.83795
12.29167	17.85359
12.29583	17.85858
12.3	17.84201
12.30417	17.8047
12.30833	17.75986
12.3125	17.72781
12.31667	17.72928
12.32083	17.77502
12.325	17.85644
12.32917	17.95373
12.33333	18.03611
12.3375	18.06639
12.34167	18.01615
12.34583	17.87425
12.35	17.65708
12.35417	17.4064
12.35833	17.17814
12.3625	17.02592
12.36667	16.98948
12.37083	17.08413
12.375	17.28964
12.37917	17.5557
12.38333	17.81811
12.3875	18.01597
12.39167	18.11438
12.39583	18.11018
12.4	18.02406
12.40417	17.89142
12.40833	17.75293
12.4125	17.63732
12.41667	17.55021
12.42083	17.47895
12.425	17.40351
12.42917	17.31007
12.43333	17.20267
12.4375	17.10014
12.44167	17.02625
12.44583	17.00416
12.45	17.04807
12.45417	17.15585
12.45833	17.30491
12.4625	17.46424
12.46667	17.6061
12.47083	17.71522
12.475	17.7903
12.47917	17.83916
12.48333	17.87521
12.4875	17.91156
12.49167	17.95567
12.49583	18.00838
12.5	18.06083
12.50417	18.1054
12.50833	18.1391
12.5125	18.16426
12.51667	18.18538
12.52083	18.20935
12.525	18.24587
12.52917	18.30129
12.53333	18.37728
12.5375	18.47136
12.54167	18.57741
12.54583	18.69068
12.55	18.80627
12.55417	18.91891
12.55833	19.0215
12.5625	19.10809
12.56667	19.17662
12.57083	19.22861
12.575	19.26873
12.57917	19.30611
12.58333	19.3578
12.5875	19.44105
12.59167	19.56813
12.59583	19.74029
12.6	19.94354
12.60417	20.15239
12.60833	20.34073
12.6125	20.48831
12.61667	20.58368
12.62083	20.63215
12.625	20.65918
12.62917	20.69305
12.63333	20.7577
12.6375	20.86439
12.64167	21.0087
12.64583	21.17352
12.65	21.33811
12.65417	21.48131
12.65833	21.58633
12.6625	21.64896
12.66667	21.67673
12.67083	21.67583
12.675	21.65219
12.67917	21.61766
12.68333	21.58797
12.6875	21.57949
12.69167	21.608
12.69583	21.68481
12.7	21.81612
12.70417	22.00051
12.70833	22.22331
12.7125	22.45291
12.71667	22.6535
12.72083	22.80406
12.725	22.89645
12.72917	22.93344
12.73333	22.93015
12.7375	22.91047
12.74167	22.90205
12.74583	22.92376
12.75	22.97375
12.75417	23.02769
12.75833	23.05615
12.7625	23.03963
12.76667	22.96779
12.77083	22.83992
12.775	22.67278
12.77917	22.49699
12.78333	22.34855
12.7875	22.2519
12.79167	22.20922
12.79583	22.20323
12.8	22.21542
12.80417	22.23035
12.80833	22.2356
12.8125	22.22453
12.81667	22.20466
12.82083	22.19382
12.825	22.21246
12.82917	22.27151
12.83333	22.37057
12.8375	22.50026
12.84167	22.65138
12.84583	22.80736
12.85	22.94612
12.85417	23.04613
12.85833	23.09269
12.8625	23.08125
12.86667	23.0158
12.87083	22.90414
12.875	22.76089
12.87917	22.60376
12.88333	22.45032
12.8875	22.30757
12.89167	22.17515
12.89583	22.0479
12.9	21.9173
12.90417	21.77795
12.90833	21.62546
12.9125	21.45881
12.91667	21.28476
12.92083	21.11412
12.925	20.95543
12.92917	20.8142
12.93333	20.69396
12.9375	20.59564
12.94167	20.51576
12.94583	20.45087
12.95	20.3963
12.95417	20.35532
12.95833	20.33457
12.9625	20.33933
12.96667	20.36776
12.97083	20.41221
12.975	20.46001
12.97917	20.49661
12.98333	20.5073
12.9875	20.48329
12.99167	20.43004
12.99583	20.37299
13	20.3398
13.00417	20.35397
13.00833	20.42441
13.0125	20.54152
13.01667	20.68433
13.02083	20.82348
13.025	20.92687
13.02917	20.96821
13.03333	20.9409
13.0375	20.859
13.04167	20.74249
13.04583	20.61294
13.05	20.48316
13.05417	20.35692
13.05833	20.23721
13.0625	20.121
13.06667	20.00134
13.07083	19.87081
13.075	19.72778
13.07917	19.58064
13.08333	19.44121
13.0875	19.32083
13.09167	19.22877
13.09583	19.17613
13.1	19.17698
13.10417	19.23801
13.10833	19.35322
13.1125	19.50618
13.11667	19.67005
13.12083	19.82096
13.125	19.93776
13.12917	20.00304
13.13333	20.01486
13.1375	19.98936
13.14167	19.95596
13.14583	19.94364
13.15	19.96997
13.15417	20.04219
13.15833	20.14834
13.1625	20.26725
13.16667	20.36738
13.17083	20.41322
13.175	20.3836
13.17917	20.2732
13.18333	20.09175
13.1875	19.85664
13.19167	19.5884
13.19583	19.3136
13.2	19.05397
13.20417	18.82768
13.20833	18.64483
13.2125	18.51266
13.21667	18.44314
13.22083	18.44653
13.225	18.52652
13.22917	18.67448
13.23333	18.86937
13.2375	19.08616
13.24167	19.29368
13.24583	19.45926
13.25	19.5568
13.25417	19.57829
13.25833	19.53641
13.2625	19.45789
13.26667	19.37405
13.27083	19.31308
13.275	19.29547
13.27917	19.3331
13.28333	19.42047
13.2875	19.5351
13.29167	19.64497
13.29583	19.71926
13.3	19.734
13.30417	19.67745
13.30833	19.54928
13.3125	19.36438
13.31667	19.15039
13.32083	18.94066
13.325	18.76372
13.32917	18.63485
13.33333	18.55414
13.3375	18.51302
13.34167	18.49748
13.34583	18.49323
13.35	18.48663
13.35417	18.47495
13.35833	18.46361
13.3625	18.46523
13.36667	18.49358
13.37083	18.55293
13.375	18.63926
13.37917	18.74533
13.38333	18.85672
13.3875	18.9543
13.39167	19.01824
13.39583	19.0396
13.4	19.01726
13.40417	18.96408
13.40833	18.89822
13.4125	18.83383
13.41667	18.78156
13.42083	18.74883
13.425	18.73201
13.42917	18.72377
13.43333	18.71863
13.4375	18.71738
13.44167	18.72205
13.44583	18.74178
13.45	18.78207
13.45417	18.83953
13.45833	18.90373
13.4625	18.96355
13.46667	19.00503
13.47083	19.02289
13.475	19.01881
13.47917	18.99517
13.48333	18.95019
13.4875	18.88305
13.49167	18.78895
13.49583	18.66228
13.5	18.50351
13.50417	18.3263
13.50833	18.15405
13.5125	18.01948
13.51667	17.95043
13.52083	17.95775
13.525	18.03202
13.52917	18.14944
13.53333	18.27805
13.5375	18.38978
13.54167	18.46675
13.54583	18.50556
13.55	18.51724
13.55417	18.52084
13.55833	18.53363
13.5625	18.56562
13.56667	18.61547
13.57083	18.67312
13.575	18.72825
13.57917	18.77502
13.58333	18.80673
13.5875	18.81976
13.59167	18.8161
13.59583	18.79789
13.6	18.76694
13.60417	18.72657
13.60833	18.675
13.6125	18.60675
13.61667	18.52158
13.62083	18.42229
13.625	18.30843
13.62917	18.1857
13.63333	18.06556
13.6375	17.96139
13.64167	17.88903
13.64583	17.86797
13.65	17.90895
13.65417	18.01224
13.65833	18.17229
13.6625	18.37193
13.66667	18.58277
13.67083	18.77797
13.675	18.93579
13.67917	19.04464
13.68333	19.10503
13.6875	19.13046
13.69167	19.13241
13.69583	19.117
13.7	19.08317
13.70417	19.01752
13.70833	18.90186
13.7125	18.72709
13.71667	18.50373
13.72083	18.26372
13.725	18.05305
13.72917	17.92308
13.73333	17.90778
13.7375	18.01613
13.74167	18.22427
13.74583	18.47855
13.75	18.71443
13.75417	18.8783
13.75833	18.9443
13.7625	18.91441
13.76667	18.81427
13.77083	18.6852
13.775	18.56543
13.77917	18.48278
13.78333	18.44493
13.7875	18.44277
13.79167	18.46222
13.79583	18.49187
13.8	18.5236
13.80417	18.54754
13.80833	18.55302
13.8125	18.52855
13.81667	18.46176
13.82083	18.34502
13.825	18.17927
13.82917	17.98038
13.83333	17.78116
13.8375	17.62342
13.84167	17.54306
13.84583	17.55944
13.85	17.66956
13.85417	17.84684
13.85833	18.0489
13.8625	18.22918
13.86667	18.34992
13.87083	18.39059
13.875	18.35316
13.87917	18.26143
13.88333	18.15031
13.8875	18.05723
13.89167	18.0093
13.89583	18.01892
13.9	18.08554
13.90417	18.19788
13.90833	18.3353
13.9125	18.47001
13.91667	18.57847
13.92083	18.64825
13.925	18.6738
13.92917	18.65677
13.93333	18.60209
13.9375	18.52172
13.94167	18.43352
13.94583	18.35716
13.95	18.30424
13.95417	18.27709
13.95833	18.27607
13.9625	18.29869
13.96667	18.33393
13.97083	18.36783
13.975	18.38659
13.97917	18.38065
13.98333	18.34665
13.9875	18.28764
13.99167	18.20652
13.99583	18.11028
14	18.01213
14.00417	17.9287
14.00833	17.87171
14.0125	17.85147
14.01667	17.87189
14.02083	17.92695
14.025	18.00642
14.02917	18.09515
14.03333	18.17144
14.0375	18.21611
14.04167	18.21514
14.04583	18.16556
14.05	18.07041
14.05417	17.94528
14.05833	17.80966
14.0625	17.68564
14.06667	17.59928
14.07083	17.56782
14.075	17.59618
14.07917	17.68047
14.08333	17.80663
14.0875	17.95692
14.09167	18.11086
14.09583	18.25662
14.1	18.38588
14.10417	18.49937
14.10833	18.60113
14.1125	18.68712
14.11667	18.74882
14.12083	18.77551
14.125	18.7526
14.12917	18.66877
14.13333	18.52475
14.1375	18.33809
14.14167	18.13513
14.14583	17.95236
14.15	17.81996
14.15417	17.75475
14.15833	17.76016
14.1625	17.82282
14.16667	17.91344
14.17083	18.00046
14.175	18.06127
14.17917	18.08493
14.18333	18.07541
14.1875	18.05506
14.19167	18.04944
14.19583	18.0835
14.2	18.17243
14.20417	18.3124
14.20833	18.48295
14.2125	18.65413
14.21667	18.78865
14.22083	18.85168
14.225	18.82572
14.22917	18.71498
14.23333	18.54066
14.2375	18.34005
14.24167	18.15339
14.24583	18.01305
14.25	17.94104
14.25417	17.94176
14.25833	17.99885
14.2625	18.08686
14.26667	18.1835
14.27083	18.27298
14.275	18.35072
14.27917	18.42201
14.28333	18.49067
14.2875	18.55766
14.29167	18.62041
14.29583	18.6685
14.3	18.68354
14.30417	18.64761
14.30833	18.55352
14.3125	18.40587
14.31667	18.22504
14.32083	18.03849
14.325	17.87134
14.32917	17.75199
14.33333	17.70635
14.3375	17.7482
14.34167	17.87177
14.34583	18.05743
14.35	18.27957
14.35417	18.50982
14.35833	18.72317
14.3625	18.89186
14.36667	18.99308
14.37083	19.02307
14.375	18.99023
14.37917	18.9053
14.38333	18.77979
14.3875	18.63088
14.39167	18.47885
14.39583	18.34674
14.4	18.24886
14.40417	18.18202
14.40833	18.13767
14.4125	18.10612
14.41667	18.07236
14.42083	18.01934
14.425	17.9366
14.42917	17.82522
14.43333	17.69696
14.4375	17.57346
14.44167	17.46846
14.44583	17.39098
14.45	17.34958
14.45417	17.34537
14.45833	17.37228
14.4625	17.42152
14.46667	17.48154
14.47083	17.54213
14.475	17.5984
14.47917	17.65095
14.48333	17.69899
14.4875	17.7498
14.49167	17.81214
14.49583	17.8894
14.5	17.98083
14.50417	18.07881
14.50833	18.16618
14.5125	18.22465
14.51667	18.24171
14.52083	18.21214
14.525	18.13736
14.52917	18.02849
14.53333	17.89637
14.5375	17.74969
14.54167	17.59764
14.54583	17.44641
14.55	17.30011
14.55417	17.16751
14.55833	17.06378
14.5625	17.00537
14.56667	17.008
14.57083	17.08133
14.575	17.22073
14.57917	17.41102
14.58333	17.63323
14.5875	17.86286
14.59167	18.07253
14.59583	18.24196
14.6	18.35893
14.60417	18.41698
14.60833	18.41994
14.6125	18.37676
14.61667	18.29936
14.62083	18.20349
14.625	18.10765
14.62917	18.0228
14.63333	17.95307
14.6375	17.90494
14.64167	17.88202
14.64583	17.88533
14.65	17.91695
14.65417	17.9802
14.65833	18.07735
14.6625	18.20452
14.66667	18.34737
14.67083	18.48071
14.675	18.57815
14.67917	18.61937
14.68333	18.58802
14.6875	18.47743
14.69167	18.29563
14.69583	18.07006
14.7	17.83477
14.70417	17.62244
14.70833	17.45886
14.7125	17.36662
14.71667	17.35631
14.72083	17.42146
14.725	17.54122
14.72917	17.68743
14.73333	17.83575
14.7375	17.97086
14.74167	18.07944
14.74583	18.1577
14.75	18.21381
14.75417	18.26665
14.75833	18.32288
14.7625	18.37764
14.76667	18.42276
14.77083	18.4471
14.775	18.4433
14.77917	18.40656
14.78333	18.33601
14.7875	18.24509
14.79167	18.15775
14.79583	18.09916
14.8	18.07838
14.80417	18.09668
14.80833	18.14912
14.8125	18.21868
14.81667	18.28116
14.82083	18.31044
14.825	18.28659
14.82917	18.20609
14.83333	18.07691
14.8375	17.92115
14.84167	17.7654
14.84583	17.64166
14.85	17.5757
14.85417	17.58002
14.85833	17.65189
14.8625	17.77802
14.86667	17.9348
14.87083	18.09692
14.875	18.23972
14.87917	18.35429
14.88333	18.43907
14.8875	18.49853
14.89167	18.53876
14.89583	18.56667
14.9	18.5845
14.90417	18.59388
14.90833	18.59065
14.9125	18.57284
14.91667	18.54215
14.92083	18.50893
14.925	18.47909
14.92917	18.4512
14.93333	18.42156
14.9375	18.38343
14.94167	18.32856
14.94583	18.2555
14.95	18.16994
14.95417	18.0873
14.95833	18.02568
14.9625	18.00066
14.96667	18.01374
14.97083	18.05221
14.975	18.09776
14.97917	18.12786
14.98333	18.12655
14.9875	18.09364
14.99167	18.04473
14.99583	18.00206
15	17.98494
15.00417	18.00532
15.00833	18.06032
15.0125	18.13328
15.01667	18.19975
15.02083	18.23234
15.025	18.21497
15.02917	18.1465
15.03333	18.03716
15.0375	17.90268
15.04167	17.76113
15.04583	17.63154
15.05	17.5278
15.05417	17.45619
15.05833	17.41839
15.0625	17.41279
15.06667	17.44274
15.07083	17.50815
15.075	17.60464
15.07917	17.72649
15.08333	17.86698
15.0875	18.01839
15.09167	18.16997
15.09583	18.30888
15.1	18.4246
15.10417	18.50745
15.10833	18.55519
15.1125	18.56371
15.11667	18.53449
15.12083	18.4785
15.125	18.41398
15.12917	18.35916
15.13333	18.32985
15.1375	18.3365
15.14167	18.38083
15.14583	18.45354
15.15	18.54294
15.15417	18.63032
15.15833	18.70378
15.1625	18.76002
15.16667	18.80158
15.17083	18.83008
15.175	18.8504
15.17917	18.86417
15.18333	18.86638
15.1875	18.84789
15.19167	18.80403
15.19583	18.73218
15.2	18.64363
15.20417	18.55639
15.20833	18.49215
15.2125	18.47236
15.21667	18.5193
15.22083	18.6444
15.225	18.84527
15.22917	19.10409
15.23333	19.39398
15.2375	19.67985
15.24167	19.93264
15.24583	20.12627
15.25	20.2466
15.25417	20.29661
15.25833	20.29649
15.2625	20.27449
15.26667	20.25871
15.27083	20.26597
15.275	20.30235
15.27917	20.36117
15.28333	20.43392
15.2875	20.50468
15.29167	20.55851
15.29583	20.58832
15.3	20.5916
15.30417	20.56984
15.30833	20.52359
15.3125	20.45125
15.31667	20.35663
15.32083	20.25312
15.325	20.16772
15.32917	20.12833
15.33333	20.1593
15.3375	20.27701
15.34167	20.47874
15.34583	20.7484
15.35	21.05335
15.35417	21.35263
15.35833	21.61003
15.3625	21.80449
15.36667	21.93188
15.37083	21.99989
15.375	22.02012
15.37917	22.00239
15.38333	21.94971
15.3875	21.86712
15.39167	21.75374
15.39583	21.60623
15.4	21.42601
15.40417	21.22534
15.40833	21.02451
15.4125	20.84972
15.41667	20.72107
15.42083	20.64653
15.425	20.62322
15.42917	20.64685
15.43333	20.70375
15.4375	20.77316
15.44167	20.8351
15.44583	20.87617
15.45	20.88861
15.45417	20.87228
15.45833	20.82711
15.4625	20.75064
15.46667	20.64467
15.47083	20.52321
15.475	20.39953
15.47917	20.284
15.48333	20.1867
15.4875	20.11696
15.49167	20.08104
15.49583	20.08212
15.5	20.11831
15.50417	20.18379
15.50833	20.27622
15.5125	20.39692
15.51667	20.53779
15.52083	20.6836
15.525	20.81652
15.52917	20.91702
15.53333	20.96537
15.5375	20.94562
15.54167	20.85392
15.54583	20.70069
15.55	20.51236
15.55417	20.32395
15.55833	20.16997
15.5625	20.08055
15.56667	20.07416
15.57083	20.14915
15.575	20.28222
15.57917	20.4354
15.58333	20.56949
15.5875	20.65004
15.59167	20.65747
15.59583	20.59209
15.6	20.4774
15.60417	20.35341
15.60833	20.26238
15.6125	20.23434
15.61667	20.27912
15.62083	20.38639
15.625	20.53263
15.62917	20.68297
15.63333	20.80161
15.6375	20.86108
15.64167	20.85343
15.64583	20.78939
15.65	20.68691
15.65417	20.56371
15.65833	20.43291
15.6625	20.30492
15.66667	20.19047
15.67083	20.09302
15.675	20.01261
15.67917	19.9497
15.68333	19.91188
15.6875	19.90828
15.69167	19.93698
15.69583	19.98794
15.7	20.04636
15.70417	20.098
15.70833	20.13148
15.7125	20.13408
15.71667	20.10173
15.72083	20.03951
15.725	19.96192
15.72917	19.8846
15.73333	19.81611
15.7375	19.76261
15.74167	19.72731
15.74583	19.70791
15.75	19.69522
15.75417	19.67529
15.75833	19.64136
15.7625	19.59126
15.76667	19.52899
15.77083	19.46301
15.775	19.40208
15.77917	19.35313
15.78333	19.31975
15.7875	19.29763
15.79167	19.27311
15.79583	19.23285
15.8	19.17243
15.80417	19.0951
15.80833	19.01305
15.8125	18.94379
15.81667	18.90109
15.82083	18.8896
15.825	18.90629
15.82917	18.93732
15.83333	18.95925
15.8375	18.95499
15.84167	18.91772
15.84583	18.8536
15.85	18.77924
15.85417	18.71435
15.85833	18.67737
15.8625	18.68215
15.86667	18.73373
15.87083	18.82503
15.875	18.93536
15.87917	19.04345
15.88333	19.12759
15.8875	19.1719
15.89167	19.16623
15.89583	19.1085
15.9	19.01274
15.90417	18.90473
15.90833	18.81191
15.9125	18.75836
15.91667	18.75414
15.92083	18.79781
15.925	18.87252
15.92917	18.9502
15.93333	18.99965
15.9375	18.9997
15.94167	18.9505
15.94583	18.86909
15.95	18.78476
15.95417	18.73134
15.95833	18.73259
15.9625	18.79559
15.96667	18.90604
15.97083	19.03007
15.975	19.12935
15.97917	19.17497
15.98333	19.1555
15.9875	19.07595
15.99167	18.96144
15.99583	18.8448
16	18.7537
16.00417	18.70123
16.00833	18.68452
16.0125	18.68549
16.01667	18.6848
16.02083	18.67005
16.025	18.63714
16.02917	18.592
16.03333	18.55223
16.0375	18.53188
16.04167	18.53668
16.04583	18.56161
16.05	18.5954
16.05417	18.62236
16.05833	18.63184
16.0625	18.62349
16.06667	18.60423
16.07083	18.58825
16.075	18.58828
16.07917	18.60521
16.08333	18.63152
16.0875	18.65323
16.09167	18.65775
16.09583	18.63657
16.1	18.59241
16.10417	18.54498
16.10833	18.52252
16.1125	18.55216
16.11667	18.64849
16.12083	18.80616
16.125	19.00289
16.12917	19.2008
16.13333	19.3619
16.1375	19.45589
16.14167	19.47037
16.14583	19.41705
16.15	19.32072
16.15417	19.2114
16.15833	19.11973
16.1625	19.06191
16.16667	19.03653
16.17083	19.0257
16.175	19.01194
16.17917	18.98216
16.18333	18.93196
16.1875	18.86752
16.19167	18.79928
16.19583	18.74136
16.2	18.70983
16.20417	18.7064
16.20833	18.7195
16.2125	18.73152
16.21667	18.73182
16.22083	18.71837
16.225	18.69732
16.22917	18.68074
16.23333	18.68102
16.2375	18.70607
16.24167	18.75859
16.24583	18.82517
16.25	18.88189
16.25417	18.90306
16.25833	18.8744
16.2625	18.79912
16.26667	18.69537
16.27083	18.58913
16.275	18.50775
16.27917	18.4725
16.28333	18.49667
16.2875	18.57444
16.29167	18.68591
16.29583	18.80254
16.3	18.90128
16.30417	18.96794
16.30833	18.99385
16.3125	18.97262
16.31667	18.90576
16.32083	18.8011
16.325	18.66993
16.32917	18.52414
16.33333	18.38149
16.3375	18.26186
16.34167	18.18871
16.34583	18.17741
16.35	18.22988
16.35417	18.33178
16.35833	18.46505
16.3625	18.60554
16.36667	18.72829
16.37083	18.818
16.375	18.87252
16.37917	18.89829
16.38333	18.90898
16.3875	18.91295
16.39167	18.91478
16.39583	18.91002
16.4	18.89696
16.40417	18.87033
16.40833	18.82892
16.4125	18.77814
16.41667	18.72525
16.42083	18.6811
16.425	18.65692
16.42917	18.65604
16.43333	18.6796
16.4375	18.71906
16.44167	18.768
16.44583	18.81417
16.45	18.84406
16.45417	18.84191
16.45833	18.79473
16.4625	18.70383
16.46667	18.57973
16.47083	18.43866
16.475	18.30345
16.47917	18.19181
16.48333	18.12091
16.4875	18.094
16.49167	18.10429
16.49583	18.13741
16.5	18.18706
16.50417	18.25994
16.50833	18.36636
16.5125	18.51425
16.51667	18.70273
16.52083	18.91295
16.525	19.11425
16.52917	19.26568
16.53333	19.33253
16.5375	19.29523
16.54167	19.16707
16.54583	18.98322
16.55	18.7888
16.55417	18.62605
16.55833	18.52284
16.5625	18.48406
16.56667	18.49696
16.57083	18.54008
16.575	18.5935
16.57917	18.64018
16.58333	18.67505
16.5875	18.69271
16.59167	18.68888
16.59583	18.66144
16.6	18.60976
16.60417	18.53183
16.60833	18.43063
16.6125	18.31844
16.61667	18.2118
16.62083	18.12269
16.625	18.06038
16.62917	18.02369
16.63333	18.00882
16.6375	18.01626
16.64167	18.04891
16.64583	18.10669
16.65	18.19238
16.65417	18.30982
16.65833	18.4552
16.6625	18.61305
16.66667	18.76074
16.67083	18.86805
16.675	18.90966
16.67917	18.87327
16.68333	18.75774
16.6875	18.57213
16.69167	18.34382
16.69583	18.11078
16.7	17.9108
16.70417	17.77452
16.70833	17.71764
16.7125	17.73526
16.71667	17.80873
16.72083	17.9076
16.725	17.99307
16.72917	18.03177
16.73333	18.01118
16.7375	17.93895
16.74167	17.84026
16.74583	17.7504
16.75	17.70057
16.75417	17.70795
16.75833	17.77235
16.7625	17.87069
16.76667	17.96407
16.77083	18.01763
16.775	18.01307
16.77917	17.9528
16.78333	17.85841
16.7875	17.76244
16.79167	17.69665
16.79583	17.67977
16.8	17.71014
16.80417	17.76355
16.80833	17.80358
16.8125	17.80134
16.81667	17.744
16.82083	17.63886
16.825	17.5108
16.82917	17.3965
16.83333	17.33654
16.8375	17.36021
16.84167	17.47612
16.84583	17.67063
16.85	17.9121
16.85417	18.16451
16.85833	18.39286
16.8625	18.56821
16.86667	18.67334
16.87083	18.70701
16.875	18.68365
16.87917	18.6248
16.88333	18.55266
16.8875	18.48439
16.89167	18.42681
16.89583	18.38063
16.9	18.33902
16.90417	18.28802
16.90833	18.2158
16.9125	18.11862
16.91667	18.00435
16.92083	17.89202
16.925	17.80722
16.92917	17.77441
16.93333	17.8097
16.9375	17.91966
16.94167	18.09557
16.94583	18.3111
16.95	18.53343
16.95417	18.72861
16.95833	18.87167
16.9625	18.95186
16.96667	18.97101
16.97083	18.94049
16.975	18.87554
16.97917	18.79249
16.98333	18.70151
16.9875	18.60173
16.99167	18.48973
16.99583	18.36081
17	18.21813
17.00417	18.0714
17.00833	17.93128
17.0125	17.80799
17.01667	17.70817
17.02083	17.63686
17.025	17.59155
17.02917	17.56247
17.03333	17.54215
17.0375	17.52673
17.04167	17.52089
17.04583	17.53085
17.05	17.55988
17.05417	17.61051
17.05833	17.68251
17.0625	17.77332
17.06667	17.87079
17.07083	17.95864
17.075	18.02345
17.07917	18.05819
17.08333	18.06528
17.0875	18.05658
17.09167	18.05503
17.09583	18.09
17.1	18.18329
17.10417	18.34044
17.10833	18.54182
17.1125	18.74833
17.11667	18.91144
17.12083	18.98665
17.125	18.94862
17.12917	18.80449
17.13333	18.593
17.1375	18.36837
17.14167	18.18097
17.14583	18.06531
17.15	18.02888
17.15417	18.05379
17.15833	18.10667
17.1625	18.15271
17.16667	18.17362
17.17083	18.17136
17.175	18.16176
17.17917	18.16386
17.18333	18.19272
17.1875	18.25393
17.19167	18.33762
17.19583	18.4233
17.2	18.48872
17.20417	18.52127
17.20833	18.52419
17.2125	18.50725
17.21667	18.48458
17.22083	18.46946
17.225	18.46949
17.22917	18.48237
17.23333	18.49446
17.2375	18.48815
17.24167	18.45115
17.24583	18.38629
17.25	18.30805
17.25417	18.23452
17.25833	18.18868
17.2625	18.18861
17.26667	18.23804
17.27083	18.32527
17.275	18.42376
17.27917	18.50105
17.28333	18.53136
17.2875	18.50521
17.29167	18.42709
17.29583	18.31332
17.3	18.19495
17.30417	18.10439
17.30833	18.06453
17.3125	18.08648
17.31667	18.16455
17.32083	18.28066
17.325	18.41137
17.32917	18.53129
17.33333	18.61759
17.3375	18.65467
17.34167	18.6439
17.34583	18.59574
17.35	18.52503
17.35417	18.44846
17.35833	18.38048
17.3625	18.33224
17.36667	18.30651
17.37083	18.29576
17.375	18.29342
17.37917	18.2953
17.38333	18.30535
17.3875	18.32896
17.39167	18.37158
17.39583	18.43419
17.4	18.5143
17.40417	18.60254
17.40833	18.67585
17.4125	18.70524
17.41667	18.67328
17.42083	18.57115
17.425	18.40337
17.42917	18.18758
17.43333	17.95301
17.4375	17.73147
17.44167	17.55722
17.44583	17.45709
17.45	17.43995
17.45417	17.50148
17.45833	17.63046
17.4625	17.8037
17.46667	17.99308
17.47083	18.17426
17.475	18.32746
17.47917	18.43814
17.48333	18.50377
17.4875	18.52797
17.49167	18.51478
17.49583	18.46966
17.5	18.4003
17.50417	18.31251
17.50833	18.21089
17.5125	18.10441
17.51667	18.00141
17.52083	17.91326
17.525	17.85415
17.52917	17.83309
17.53333	17.85093
17.5375	17.90127
17.54167	17.97242
17.54583	18.04549
17.55	18.09726
17.55417	18.11103
17.55833	18.07751
17.5625	18.00266
17.56667	17.90111
17.57083	17.79031
17.575	17.68801
17.57917	17.60948
17.58333	17.56346
17.5875	17.54633
17.59167	17.54766
17.59583	17.55937
17.6	17.57937
17.60417	17.61443
17.60833	17.67382
17.6125	17.77015
17.61667	17.91379
17.62083	18.10651
17.625	18.33667
17.62917	18.57482
17.63333	18.78536
17.6375	18.93467
17.64167	19.00104
17.64583	18.97785
17.65	18.87692
17.65417	18.72962
17.65833	18.57258
17.6625	18.43638
17.66667	18.338
17.67083	18.2747
17.675	18.2343
17.67917	18.20004
17.68333	18.16106
17.6875	18.1139
17.69167	18.06692
17.69583	18.0369
17.7	18.0366
17.70417	18.06912
17.70833	18.12623
17.7125	18.1917
17.71667	18.24981
17.72083	18.28956
17.725	18.30628
17.72917	18.30096
17.73333	18.28043
17.7375	18.25404
17.74167	18.22689
17.74583	18.19914
17.75	18.1678
17.75417	18.13303
17.75833	18.09642
17.7625	18.05986
17.76667	18.02328
17.77083	17.98905
17.775	17.96089
17.77917	17.94428
17.78333	17.94327
17.7875	17.96145
17.79167	18.00173
17.79583	18.06767
17.8	18.15551
17.80417	18.25362
17.80833	18.34925
17.8125	18.43044
17.81667	18.48696
17.82083	18.51258
17.825	18.50342
17.82917	18.46007
17.83333	18.38599
17.8375	18.28707
17.84167	18.16686
17.84583	18.03151
17.85	17.89687
17.85417	17.77934
17.85833	17.6981
17.8625	17.66988
17.86667	17.7027
17.87083	17.79864
17.875	17.94907
17.87917	18.13516
17.88333	18.3307
17.8875	18.51201
17.89167	18.66199
17.89583	18.76545
17.9	18.81645
17.90417	18.81556
17.90833	18.76801
17.9125	18.68926
17.91667	18.59649
17.92083	18.5076
17.925	18.43922
17.92917	18.40117
17.93333	18.39246
17.9375	18.39853
17.94167	18.4009
17.94583	18.38096
17.95	18.32452
17.95417	18.23102
17.95833	18.11292
17.9625	17.99563
17.96667	17.90724
17.97083	17.86373
17.975	17.86785
17.97917	17.90891
17.98333	17.97359
17.9875	18.04695
17.99167	18.11743
17.99583	18.18486
18	18.2614
18.00417	18.36596
18.00833	18.51016
18.0125	18.68798
18.01667	18.87969
18.02083	19.05629
18.025	19.18975
18.02917	19.2547
18.03333	19.23827
18.0375	19.14744
18.04167	19.00564
18.04583	18.84576
18.05	18.69839
18.05417	18.5826
18.05833	18.50575
18.0625	18.46358
18.06667	18.44336
18.07083	18.42712
18.075	18.40285
18.07917	18.37016
18.08333	18.33342
18.0875	18.30247
18.09167	18.29025
18.09583	18.30632
18.1	18.35722
18.10417	18.44343
18.10833	18.55835
18.1125	18.69311
18.11667	18.84042
18.12083	18.99548
18.125	19.14462
18.12917	19.27263
18.13333	19.3673
18.1375	19.41597
18.14167	19.41264
18.14583	19.35699
18.15	19.25387
18.15417	19.11889
18.15833	18.97239
18.1625	18.83761
18.16667	18.72698
18.17083	18.64959
18.175	18.61127
18.17917	18.61001
18.18333	18.64469
18.1875	18.7115
18.19167	18.80362
18.19583	18.91622
18.2	19.0408
18.20417	19.17006
18.20833	19.29322
18.2125	19.40454
18.21667	19.49738
18.22083	19.56551
18.225	19.60882
18.22917	19.62832
18.23333	19.62464
18.2375	19.60053
18.24167	19.55837
18.24583	19.504
18.25	19.44407
18.25417	19.38675
18.25833	19.33425
18.2625	19.2896
18.26667	19.25539
18.27083	19.23256
18.275	19.2179
18.27917	19.20954
18.28333	19.20522
18.2875	19.20262
18.29167	19.1989
18.29583	19.1928
18.3	19.1839
18.30417	19.17501
18.30833	19.16731
18.3125	19.16305
18.31667	19.16347
18.32083	19.17524
18.325	19.20153
[truncated: 1,362 more rows]
